# Supplementary material
Source: ML conference proceedings conference paper supplement (https://openaccess.thecvf.com/content/cvpr_2015/html/Shekhovtsov_Maximum_Persistency_via_2015_CVPR_paper.html)
Supplement: Supplementary file 2 [file Shekhovtsov_Maximum_Persistency_via_2015_CVPR_supplemental.zip]

Archive with 2 entries (2 files):
- 1888-supp.avi
- 1888-supp.pdf
